# Supplementary material
Source: publisher figshare collection journal article supplement (https://frontiersin.figshare.com/ndownloader/files/28203999)

Supplementary Figure 1

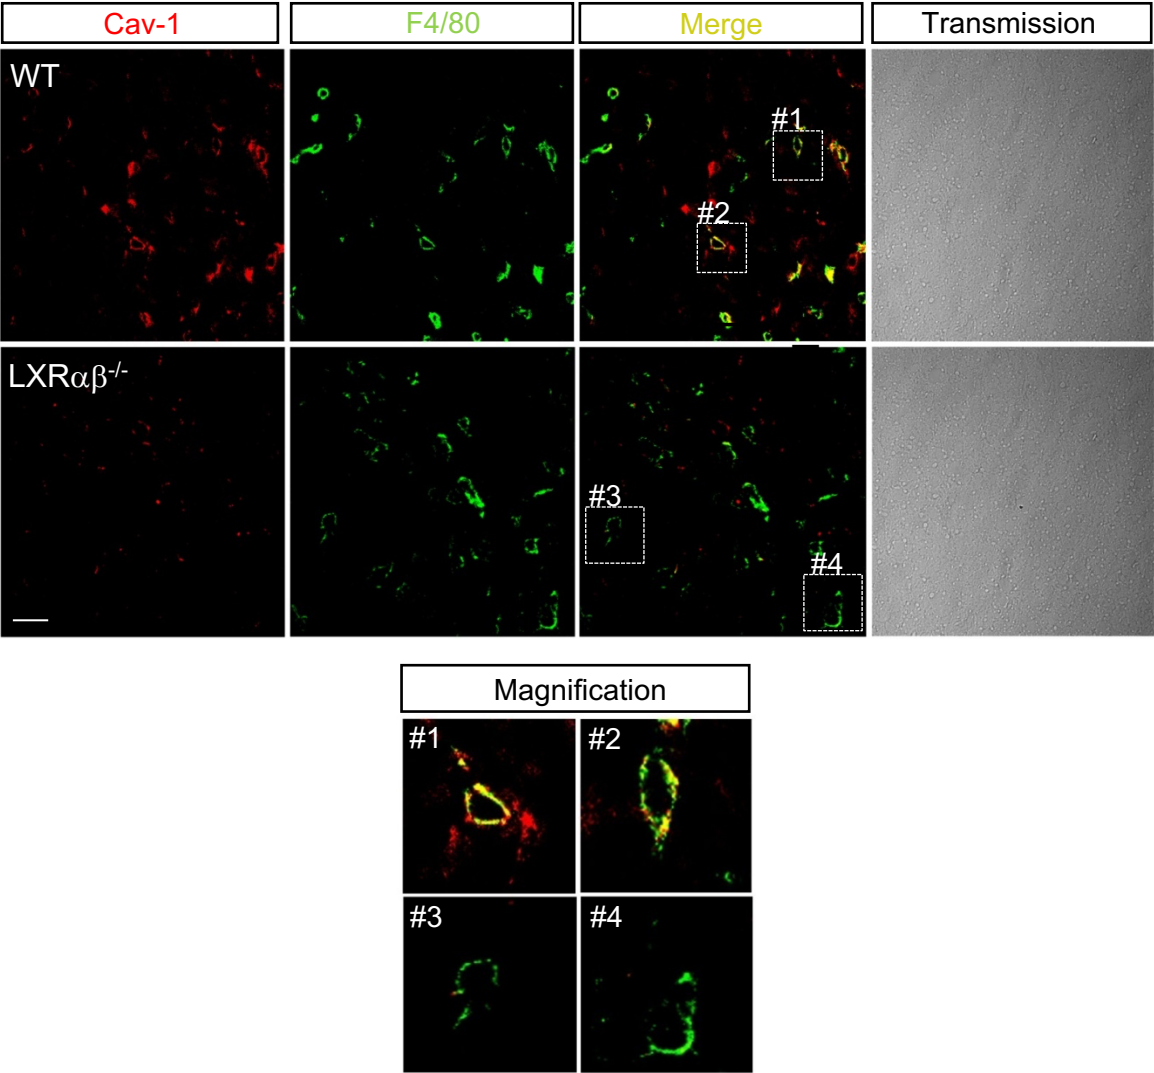

Supplement: Supplementary file [file 28203999]
